# Supplementary material
Source: PubMed Central journal article supplement (PMC3494886)
Supplement: 1206390109_pnas.201206390SI.pdf [file 1206390109_pnas.201206390SI.pdf]

# Supporting Information

Fonseca-Azevedo and Herculano-Houzel 10.1073/pnas.1206390109

**Table S1. Estimates of number of daily hours of feeding required for viability of different primate species, given their body mass and the number of brain neurons**

| Species                                        | M <sub>BD</sub> | Feeding per day, h | Feeding, kCal/h* | N <sub>BR</sub> | Required daily feeding, h <sup>†</sup> |
|------------------------------------------------|-----------------|--------------------|------------------|-----------------|----------------------------------------|
| <i>Callithrix jacchus</i>                      | 0.37            | 3.24               | 10.3             | 0.6 billion     | 2.4                                    |
| <i>Saimiri sciureus</i>                        | 0.72            | 1.32               | 41.5             | 3.2 billion     | 3.5                                    |
| <i>Aotus trivirgatus</i>                       | 0.78            | 6.36               | 8.9              | 1.5 billion     | 3.0                                    |
| <i>Cebus apella</i>                            | 3.1             | 2.92               | 55.8             | 3.8 billion     | 4.0                                    |
| <i>Macaca fascicularis</i>                     | 4.5             | 4.08               | 52.8             | 3.4 billion     | 4.2                                    |
| <i>Macaca radiata</i>                          | 5.3             | 3.60               | 67.5             | 3.8 billion     | 4.4                                    |
| <i>Papio cynocephalus</i>                      | 17.8            | 5.50               | 100.0            | 10.9 billion    | 5.8                                    |
| <i>Homo habilis</i> <sup>‡</sup>               | 33.0            | —                  | —                | 40.0 billion    | 7.5                                    |
| <i>Australopithecus afarensis</i> <sup>‡</sup> | 38.0            | —                  | —                | 34.7 billion    | 7.4                                    |
| <i>Paranthropus boisei</i> <sup>‡</sup>        | 41.0            | —                  | —                | 32.8 billion    | 7.4                                    |
| <i>Pan troglodytes</i>                         | 44.0            | 6.80               | 175.6            | 27.5 billion    | 7.3                                    |
| <i>Pongo pygmaeus</i>                          | 57.2            | 7.20               | 202.0            | 32.6 billion    | 7.8                                    |
| <i>Homo erectus</i> <sup>‡</sup>               | 58.0            | —                  | —                | 62.0 billion    | 8.6                                    |
| <i>Homo sapiens</i> <sup>‡</sup>               | 70.0            | —                  | —                | 86.0 billion    | 9.3                                    |
| <i>Homo heidelbergensis</i> <sup>‡</sup>       | 71.0            | —                  | —                | 75.9 billion    | 9.1                                    |
| <i>Homo neanderthalensis</i> <sup>‡</sup>      | 72.0            | —                  | —                | 84.8 billion    | 9.3                                    |
| <i>Gorilla gorilla</i>                         | 124.7           | 7.8                | 334.7            | 33.4 billion    | 8.8                                    |

M<sub>BD</sub>, body mass (from refs. 1–3); N<sub>BR</sub>, total number of brain neurons, determined directly (refs. 4–6) or estimated (ref. 7).

\*Estimated energy intake per hour spent feeding daily (*Materials and Methods*).

<sup>†</sup>Number of daily hours of feeding estimated to render viable the given combination of body mass and number of brain neurons.

<sup>‡</sup>*H. sapiens* and extinct hominins.

- Sousa A, Wood B (2007) The hominin fossil record and the emergence of the modern human central nervous system. *Evolution of Nervous Systems: A Comprehensive Reference: The Evolution of Primate Nervous Systems*, ed Kaas JH, (Elsevier, Oxford), Vol 4, pp 291–336.
- Ross CF, et al. (2009) Ecological consequences of scaling of chew cycle duration and daily feeding time in primates. *J Hum Evol* 56(6):570–585.
- Semendeferi K, Damasio H (2000) The brain and its main anatomical subdivisions in living hominoids using magnetic resonance imaging. *J Hum Evol* 38(2):317–332.
- Azevedo FAC, et al. (2009) Equal numbers of neuronal and nonneuronal cells make the human brain an isometrically scaled-up primate brain. *J Comp Neurol* 513(5):532–541.
- Herculano-Houzel S, Collins CE, Wong P, Kaas JH (2007) Cellular scaling rules for primate brains. *Proc Natl Acad Sci USA* 104(9):3562–3567.
- Gabi M, et al. (2010) Cellular scaling rules for the brains of an extended number of primate species. *Brain Behav Evol* 76(1):32–44.
- Herculano-Houzel S, Kaas JH (2011) Gorilla and orangutan brains conform to the primate cellular scaling rules: Implications for human evolution. *Brain Behav Evol* 77(1):33–44.

**Table S2. Maximal viable combinations of body mass and numbers of neurons depending on the number of hours spent feeding per day**

| Feeding hours | Maximal body mass | Maximal no. of brain neurons |
|---------------|-------------------|------------------------------|
| 1             | 10 g              | 6 million                    |
| 2             | 49 g              | 514 million                  |
| 3             | 297 g             | 2 billion                    |
| 4             | 1.1 kg            | 5 billion                    |
| 5             | 2.9 kg            | 11 billion                   |
| 6             | 7.6 kg            | 23 billion                   |
| 7             | 13.0 kg           | 34 billion                   |
| 8             | 23.7 kg           | 53 billion                   |
| 9             | 40.1 kg           | 79 billion                   |
| 10            | 64.2 kg           | 113 billion                  |

Calculations consider that the total energetic cost of the animal is the sum of the energetic cost of the body  $E_{BD} = 70 M_{BD}^{0.750}$  and  $E_{BR} = 6 \times 10^{-9} N$ , which has to be supported by the total energetic intake  $E_{IN} = H \times 25.352 E_{BD}^{0.526}$ .

**Table S3. Maximal numbers of neurons that a primate of a given body mass could afford depending on the number of hours spent feeding per day**

| $M_{BD}$ , kg | Feeding hours |       |       |        |        |
|---------------|---------------|-------|-------|--------|--------|
|               | 4 h/d         | 6 h/d | 8 h/d | 10 h/d | 12 h/d |
| 0.5           | 5 B           | 11 B  | 16 B  | 22 B   | 28 B   |
| 1             | 5 B           | 14 B  | 22 B  | 30 B   | 39 B   |
| 2             | 5 B           | 17 B  | 29 B  | 41 B   | 53 B   |
| 5             | 4 B           | 20 B  | 40 B  | 60 B   | 79 B   |
| 10            | NV            | 20 B  | 48 B  | 76 B   | 105 B  |
| 15            | NV            | 16 B  | 52 B  | 87 B   | 122 B  |
| 20            | NV            | 12 B  | 53 B  | 94 B   | 135 B  |
| 25            | NV            | 7 B   | 53 B  | 99 B   | 145 B  |
| 50            | NV            | NV    | 45 B  | 111 B  | 178 B  |
| 75            | NV            | NV    | 30 B  | 112 B  | 194 B  |
| 100           | NV            | NV    | 12 B  | 107 B  | 203 B  |
| 150           | NV            | NV    | NV    | 89 B   | 207 B  |
| 200           | NV            | NV    | NV    | 65 B   | 202 B  |
| 250           | NV            | NV    | NV    | 38 B   | 192 B  |
| 300           | NV            | NV    | NV    | 8 B    | 178 B  |
| 350           | NV            | NV    | NV    | NV     | 160 B  |

Calculations consider that the total energetic cost of the animal is the sum of the energetic cost of the body  $E_{BD} = 70 M_{BD}^{0.750}$  and  $E_{BR} = 6 \times 10^{-9} N$ , which has to be supported by the total energetic intake  $E_{IN} = H \times 25.352 M_{BD}^{0.526}$ . When  $E_{IN} < (E_{BD} + E_{BR})$ , the animal is not viable. B, billion;  $E_{BD}$ , body energy expenditure;  $E_{BR}$ , brain energy expenditure;  $E_{IN}$ , caloric intake;  $M_{BD}$ , body mass; NV, not viable.
